# Supplementary material for: Sustained meningeal lymphatic vessel atrophy or expansion does not alter Alzheimer’s disease-related amyloid pathology
Source: PubMed Central journal article supplement (PMC7616318; doi:10.1038/s44161-024-00445-9), 2024-03-15

**Fig.4 (b)**

**VEGFR-3 (1:1000, # AF743, R&D).**

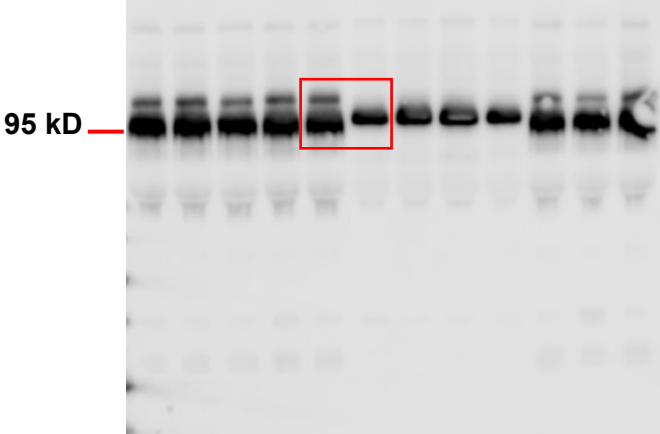

Supplement: EMS196559-supplement-Source_Data_Fig__4.pdf [file EMS196559-supplement-Source_Data_Fig__4.pdf]
